# Supplementary material for: Cobalt/titanium nitride@N-doped carbon hybrids for enhanced electrocatalytic hydrogen evolution and supercapacitance
Source: Royal Society of Chemistry journal article supplement (doi:10.1039/c9nj03531a), 2019-01-01
Supplement: c9nj03531a1.pdf [file c9nj03531a1.pdf]

## Supporting Information

# **Cobalt/Titanium Nitride@N-doped Carbon Hybrid for Enhanced Electrocatalytic Hydrogen Evolution and Supercapacitance**

Qing Zhu <sup>a</sup>, Lingmin Yao <sup>c</sup>, Rui Tong <sup>a</sup>, Dong Liu <sup>a</sup>, Kar Wei Ng <sup>a\*</sup> and Hui Pan <sup>\*a,b</sup>

<sup>a</sup> Joint Key Laboratory of the Ministry of Education, Institute of Applied Physics and Materials Engineering, University of Macau, Macao SAR

<sup>b</sup> Department of Physics and Chemistry, Faculty of Science and Technology, University of Macau, Macao SAR

<sup>c</sup> School of Physics and Electronic Engineering, Guangzhou University, Guangzhou, 510006, China

\*Corresponding author:

Hui Pan; Email addresses: huipan@um.edu.mo

Kar Wei Ng; Email addresses: billyng@um.edu.mo

**Table S1** the content molar ratio of Ti and Co in the Co-TiN@NG-x/CC from ICP results.

| $n_{\text{Ti}}: n_{\text{Co}}$ | Co-TiN@NG-1/<br>CC | Co-TiN@NG-2<br>/CC | Co-TiN@NG-4<br>/CC | Co-TiN@NG-<br>8/CC |
|--------------------------------|--------------------|--------------------|--------------------|--------------------|
| Theoretical<br>result          | 1:1                | 2:1                | 4:1                | 8:1                |
| ICP result                     | 1.05:1             | 2.03:1             | 4.05:1             | 8.06:1             |

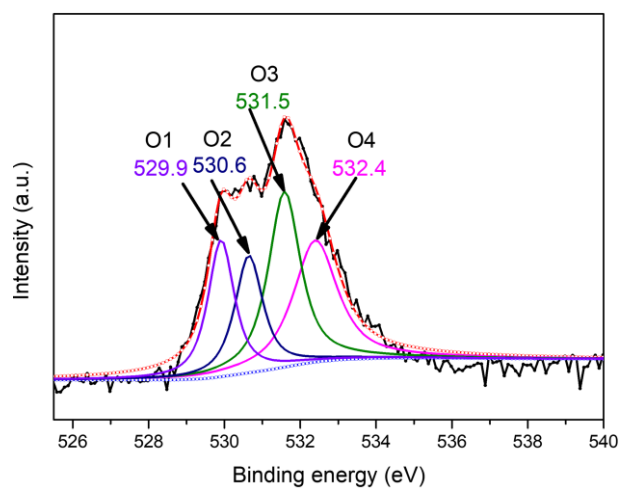

**Fig. S1** XPS spectra of O 1s species on the surface of Co-TiN@NG-2/CC.

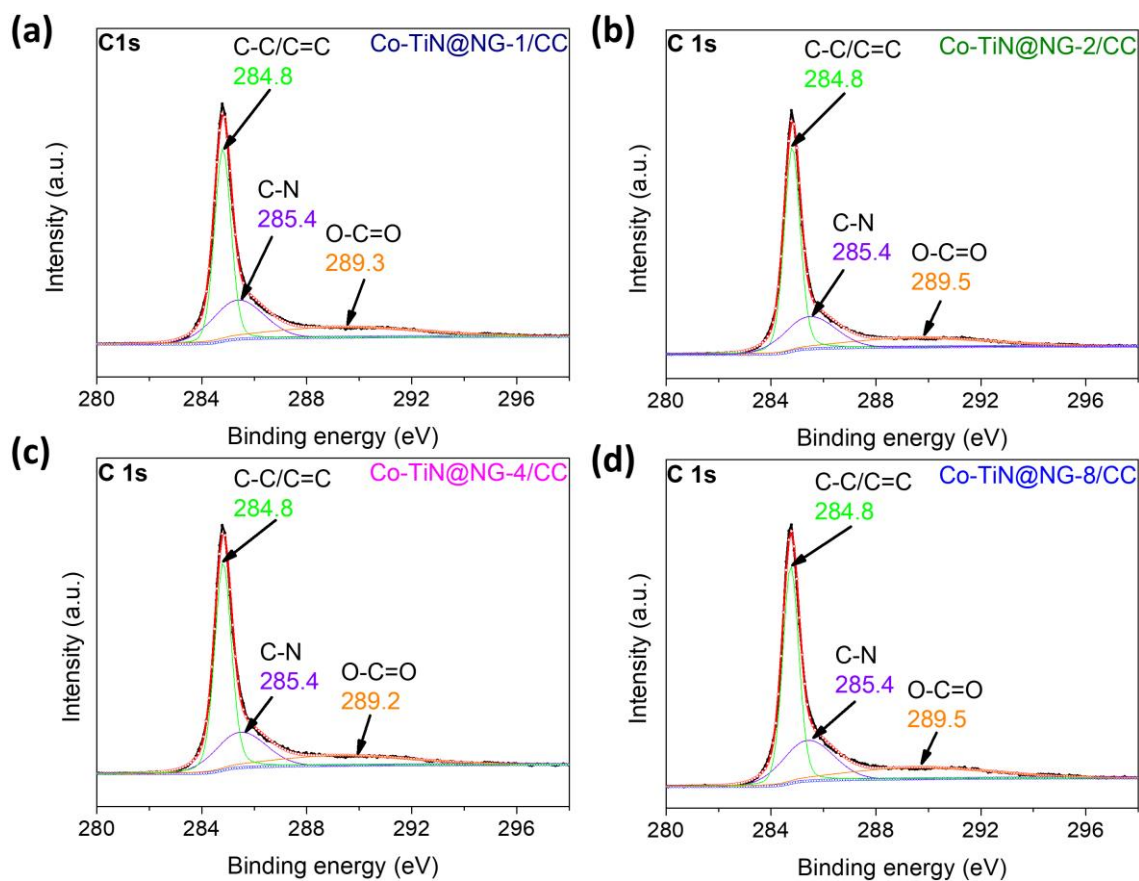

**Fig. S2** High-resolution XPS spectra of C 1s of (a) Co-TiN@NG-1/CC, (b) Co-TiN@NG-2/CC, (c) Co-TiN@NG-4/CC and (d) Co-TiN@NG-8/CC

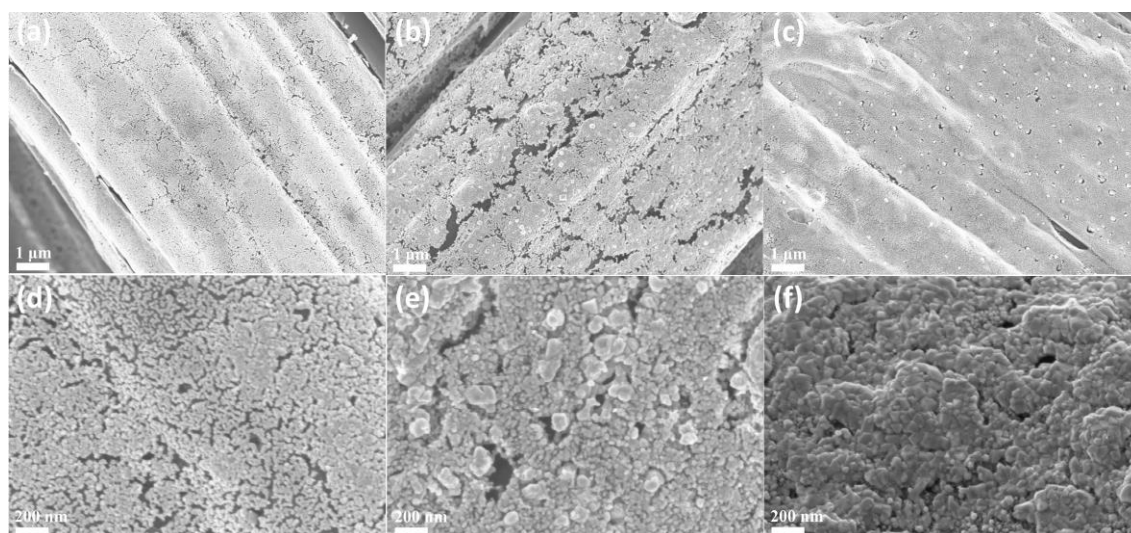

**Fig. S3** FESEM images for (a) Co-TiN@NG-8/CC, (b) Co-TiN@NG-4/CC and (c) Co-TiN@NG-1/CC in low magnification, and (d) Co-TiN@NG-8/CC, (e) Co-TiN@NG-4/CC and (f) Co-TiN@NG-1/CC in high magnification.

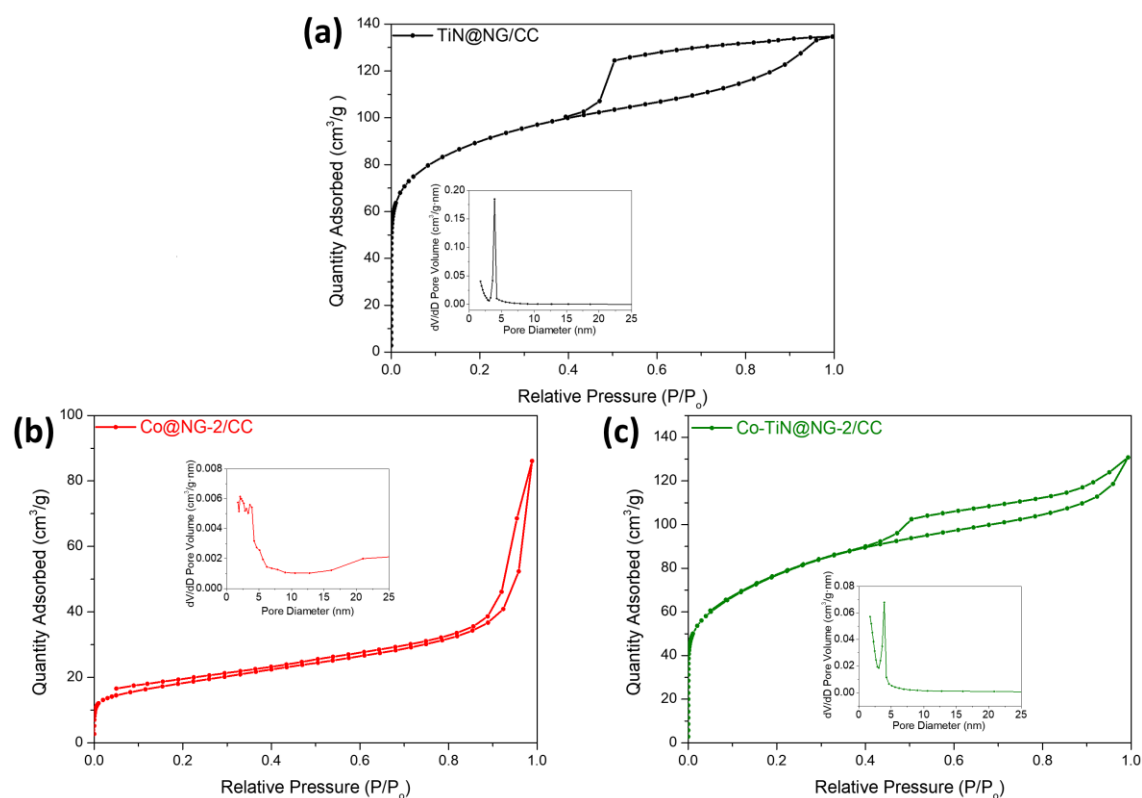

**Fig. S4** N<sub>2</sub> adsorption/desorption isotherms and (inset) corresponding pore size distributions of (a) TiN@NG/CC, (b) Co@NG-2/CC and (c) Co-TiN@NG-2/CC

**Table S2** Comparisons of HER electrocatalytic activity of Co-TiN with recently reported noble metal-free catalysts under alkaline conditions.

| Catalyst                                 | Substrate | Overpotential<br>at 10 mA/cm <sup>-2</sup><br>(mV) | Stability<br>Time/CV<br>cycles | Electrolyte | Reference |
|------------------------------------------|-----------|----------------------------------------------------|--------------------------------|-------------|-----------|
| Co-TiN@NG-2/CC                           | CC        | 208                                                | 24 h/1000<br>cycles            | 1 M KOH     | This work |
| MoS <sub>2</sub> /MoSe <sub>2</sub>      | GCE       | 235                                                | 3 h                            | 1 M KOH     | 4         |
| Co-BDC/MoS <sub>2</sub>                  | GCE       | 248                                                | 15 h/2000<br>cycles            | 1 M KOH     | 5         |
| Ni(OH) <sub>2</sub> /MoS <sub>2</sub>    | GCE       | 227                                                | 1000<br>cycles                 | 1 M KOH     | 6         |
| CoSe <sub>2</sub> /MoSe <sub>2</sub>     | GCE       | 218                                                | 1000<br>cycles                 | 1 M KOH     | 7         |
| MoSe <sub>2</sub> @Ni <sub>0.85</sub> Se | NF        | 117                                                | 20 h/1000<br>cycles            | 1 M KOH     | 8         |
| Ni-Mo <sub>x</sub> C                     | GCE       | 183                                                | 24 h/1000                      | 1 M KOH     | 9         |

|                                        |     |     |           |           |    |
|----------------------------------------|-----|-----|-----------|-----------|----|
| Fe-Ni <sub>3</sub> C                   | GCE | 292 | 10 h/1000 | 1 M KOH   | 10 |
|                                        |     |     | cycles    |           |    |
| Co <sub>2</sub> P/WC@C                 | GCE | 180 | 12 h/1000 | 1 M KOH   | 11 |
|                                        |     |     | cycles    |           |    |
| Fe <sub>3</sub> C-Mo <sub>2</sub> C/NC | GCE | 180 | -         | 1 M KOH   | 12 |
|                                        |     |     | cycles    |           |    |
| HNFs                                   |     |     |           |           |    |
| WC@CNS                                 | NF  | 220 | 5 h       | 0.1 M KOH | 13 |
| TaC@CNS                                | NF  | 250 | -         | 0.1 M KOH | 13 |
| NbC@CNS                                | NF  | 240 | -         | 0.1 M KOH | 13 |
| Co <sub>1.11</sub> Te <sub>2</sub> /C  | GCE | 178 | 20 h/1000 | 1 M KOH   | 14 |
|                                        |     |     | cycles    |           |    |

**Table S3** Mass activity (MA) and turnover frequency (TOF) of HER electrocatalysts in 1 M KOH.

| Catalysts      | Mass activity (mA·mg <sup>-1</sup> ) | TOF (s <sup>-1</sup> ) |
|----------------|--------------------------------------|------------------------|
| TiN@NG/CC      | 1.64                                 | 0.00049                |
| Co@NG/CC       | 1.48                                 | 0.00044                |
| Co-TiN@NG-8/CC | 4.06                                 | 0.0012                 |
| Co-TiN@NG-4/CC | 5.12                                 | 0.0015                 |
| Co-TiN@NG-2/CC | 5.95                                 | 0.0018                 |
| Co-TiN@NG-1/CC | 3.78                                 | 0.0011                 |

**Table S4** Fitting results of Nyquist plots for all the samples.

| Sample         | $R_s$ ( $\Omega$ ) | $R_{ct}$ ( $\Omega$ ) |
|----------------|--------------------|-----------------------|
| TiN@NG/CC      | 2.568              | 139.3                 |
| Co@NG/CC       | 2.664              | 20.07                 |
| Co-TiN@NG-8/CC | 2.377              | 4.999                 |
| Co-TiN@NG-4/CC | 2.474              | 4.837                 |
| Co-TiN@NG-2/CC | 2.289              | 3.4                   |
| Co-TiN@NG-8/CC | 3.736              | 5.583                 |

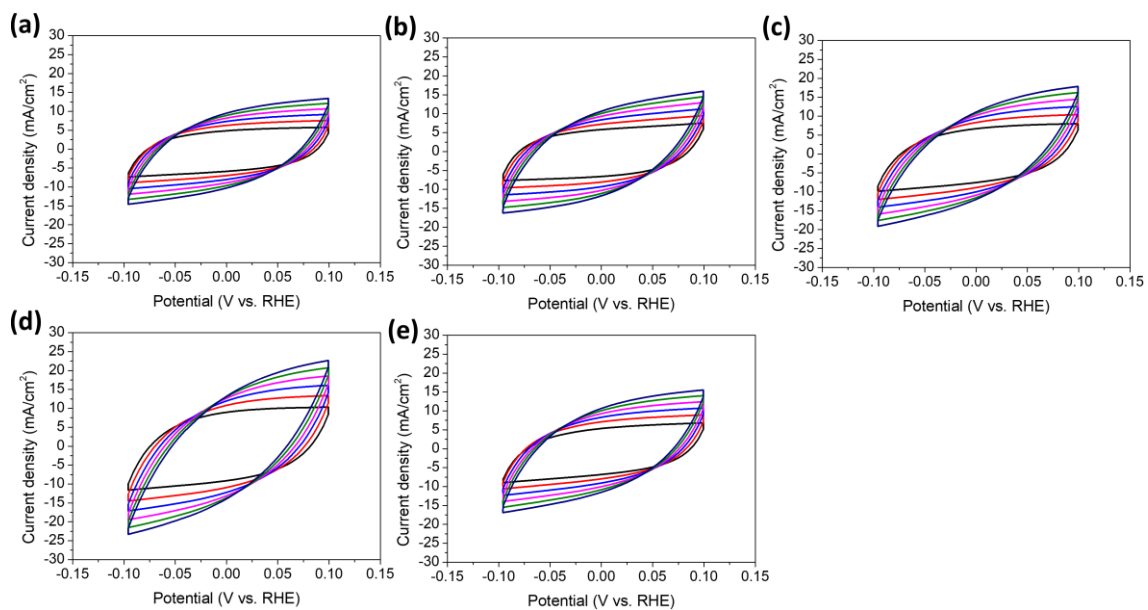

**Fig. S5** CV curves at various scan rates for the determination of  $C_{dl}$  for sample (a) TiN@NG/CC, (b) Co-TiN@NG-8/CC, (c) Co-TiN@NG-4/CC (d) Co-TiN@NG-2/CC and (e) Co-TiN@NG-1/CC.

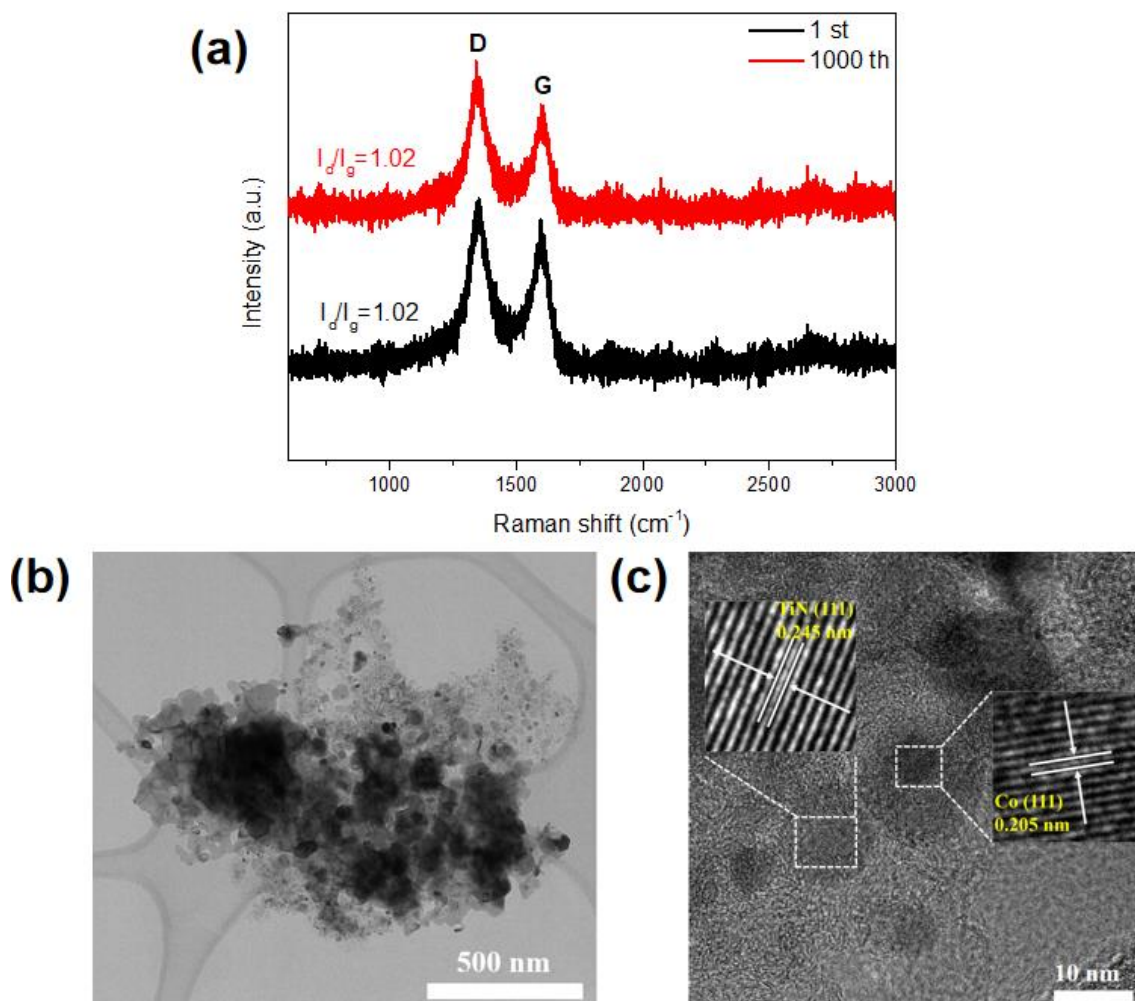

**Fig. S6** (a) Raman spectra, (b) TEM image and (c) HRTEM image of Co-TiN@NG-2/CC catalyst after the continuous scanning test.

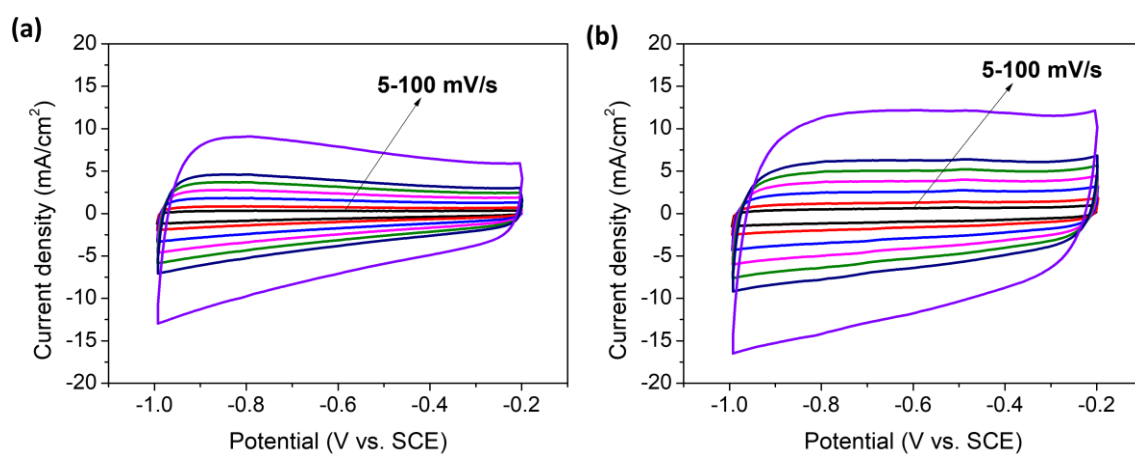

**Fig. S7** CV curves of (a) TiN@NG/CC and (b) Co-TiN@NG-2/CC at different scanning rates from 5 to 100 mV/s.

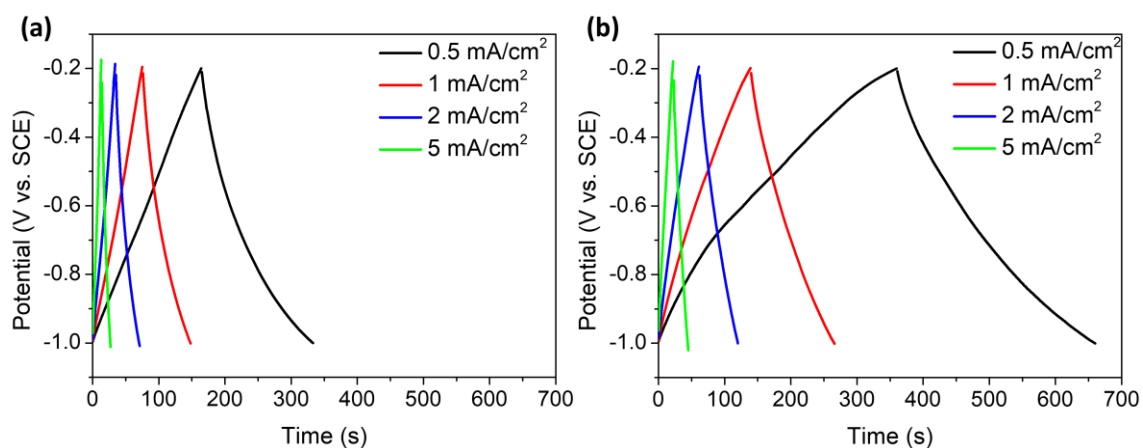

**Fig. S8** GCD curves of (a) TiN@NG/CC and (b) Co-TiN@NG-2/CC at different current densities from 0.5 to 5 mA/cm<sup>2</sup> in 1 M KOH.

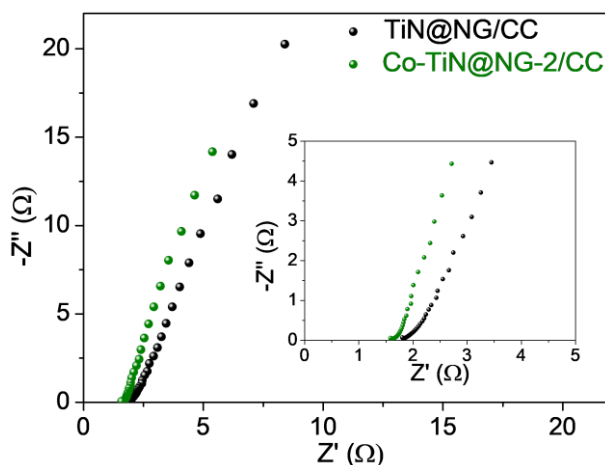

**Fig. S9** EIS test of TiN@NG/CC and Co-TiN@NG-2/CC at an open-circuit potential in 1 M KOH.

**Table S5** Comparison the capacitance performance of Co-TiN with other metal nitrides that have been reported recently.

| Electrodes                | Potential Range          | Electrolyte                          | Capacitance                                                  | Reference |
|---------------------------|--------------------------|--------------------------------------|--------------------------------------------------------------|-----------|
| Co-TiN@NG-2/CC            | -1.0 to -0.2 V (Vs. SCE) | 1.0 M KOH                            | 88.5 F/g (148.6 mF/cm <sup>2</sup> ) at 2 mA/cm <sup>2</sup> | This work |
| Si@Ti@TiN thin film array | 0 to 0.8 V (Vs. Ag/AgCl) | 0.5 M H <sub>2</sub> SO <sub>4</sub> | 43.8 mF/cm <sup>2</sup> at 1.0 mA/cm <sup>2</sup>            | 6         |
| TiN                       | -0.8 to 0.2 V            | 2.0 M KOH                            | 38.5 F/g at 40 mV/s                                          | 7         |



|                                    |                                                         |                                      |                                                     |    |
|------------------------------------|---------------------------------------------------------|--------------------------------------|-----------------------------------------------------|----|
|                                    | (Vs. SCE)                                               |                                      |                                                     |    |
| TiN/CNT                            | -0.6 to 0.25 V                                          | 7.5 M KOH                            | 89.96 F/g at 10 mV/s                                | 8  |
|                                    | (Vs. SCE)                                               |                                      |                                                     |    |
| MoN <sub>x</sub> /TiN NTA          | -1.2 to -0.6 V                                          | 1.0 M LiOH                           | 121.50 mF/cm <sup>2</sup> at 0.3 mA/cm <sup>2</sup> | 9  |
|                                    | (Vs. SCE)                                               |                                      |                                                     |    |
| TiN@C                              | -1 to 0 V (Vs. SCE)                                     | 1.0 M KOH                            | 11.15 mF/cm <sup>2</sup> at 10 mV/s                 | 10 |
|                                    | (Vs. SCE)                                               |                                      |                                                     |    |
| TiN/C                              | -1.2 to 0.4 V                                           | 1.0 M KOH                            | 102.6 F/g at 1 A/g                                  | 11 |
|                                    | (Vs. SCE)                                               |                                      |                                                     |    |
| TiN/C                              | -1.0 to 0 V (Vs. SCE)                                   | 1.0 M KOH                            | 159.0 F/g at 0.5 A/g                                | 12 |
|                                    | (Vs. SCE)                                               |                                      |                                                     |    |
| Nb <sub>4</sub> N <sub>5</sub> @NC | 0 to 0.6 V (Vs. Ag/AgCl)                                | 1.0 M KOH                            | 243.6 mF/cm <sup>2</sup> at 0.5 mA/cm <sup>2</sup>  | 13 |
|                                    | (Vs. Hg/Hg <sub>2</sub> SO <sub>4</sub> )               |                                      |                                                     |    |
| GaN                                | -0.5 to 0.4 V (Vs. Hg/Hg <sub>2</sub> SO <sub>4</sub> ) | 1.0 M H <sub>2</sub> SO <sub>4</sub> | 24 F/g at 0.5 mA/cm <sup>2</sup>                    | 14 |
|                                    | (Vs. Ag/AgCl)                                           |                                      |                                                     |    |
| CrN                                | 0 to 0.8 V (Vs. Ag/AgCl)                                | 0.5 M H <sub>2</sub> SO <sub>4</sub> | 12.8 mF/cm <sup>2</sup> at 1 mA/cm <sup>2</sup>     | 15 |
